# Supplementary material
Source: Royal Society of Chemistry journal article supplement (doi:10.1039/d6nj01463a)
Supplement: d6nj01463a1.pdf [file d6nj01463a1.pdf]

## Supporting Information

### Efficient Piezocatalytic Hydrogen Peroxide Production over CdS/ZnS Heterostructured Nanorods via Ultrasonic Cavitation in Pure Water

RenWei Huang,<sup>a,b</sup> Quankang Yang,<sup>b</sup> Xiaoxiao Lu,<sup>b</sup> Xiaojing Zhao,<sup>b</sup> Miaoling Huang,<sup>b</sup>  
Miaoqiong Xu,<sup>b</sup> Xueshen Liu,<sup>a\*</sup> Xiaoyang Pan,<sup>b\*</sup> Bo Weng,<sup>c,d\*</sup>

<sup>a</sup> College of Materials Engineering, Fujian Agriculture and Forestry University,  
Fuzhou, 350000, China.

<sup>b</sup> College of Chemical Engineering and Materials, Quanzhou Normal University,  
Quanzhou, 362000, China.

<sup>c</sup> State Key Laboratory of Advanced Environmental Technology, Institute of Urban  
Environment, Chinese Academy of Sciences, 1799 Jimei Road,  
Xiamen 361021, P. R. China.

<sup>d</sup> University of Chinese Academy of Sciences, 19A Yuquan Road,  
Beijing 100049, China.

**Corresponding Author: Prof. Xueshen Liu, E-mail: [272829063@qq.com](mailto:272829063@qq.com) Prof.**

**Xiaoyang Pan, E-mail: [xypan@qztc.edu.cn](mailto:xypan@qztc.edu.cn) Prof. Bo Weng, Email: [bweng@iue.ac.cn](mailto:bweng@iue.ac.cn)**

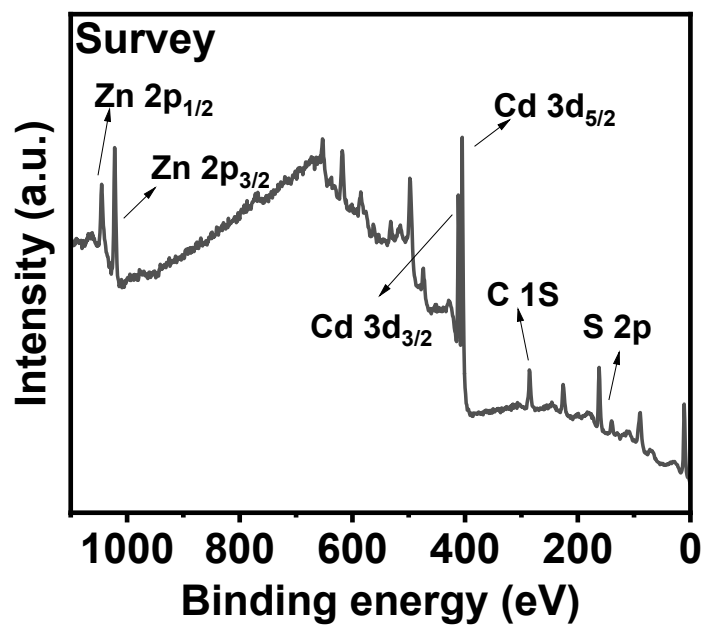

Fig. S1. XPS survey spectrum of CdS/ZnS-1.

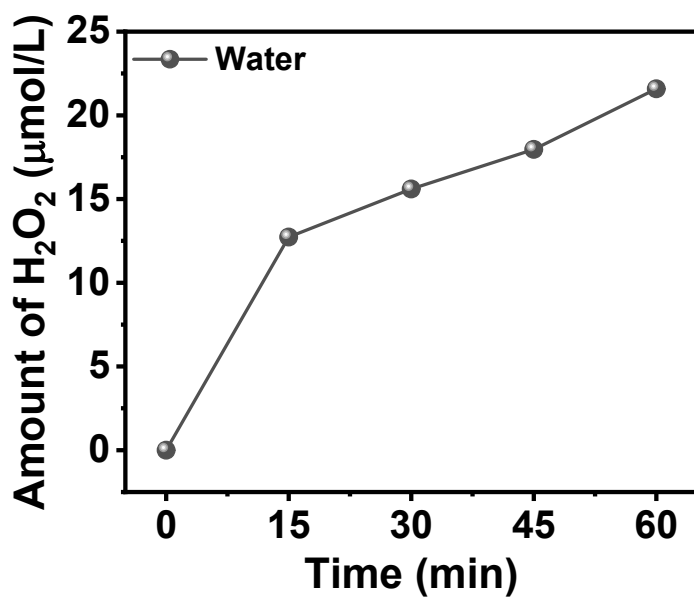

Fig. S2. H<sub>2</sub>O<sub>2</sub> evolution in pure water without catalysts.

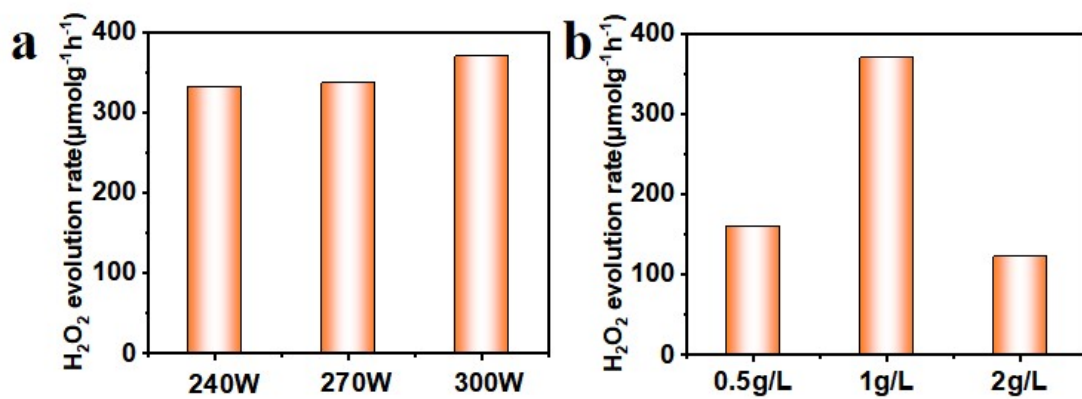

**Fig. S3.** (a) Comparison of H<sub>2</sub>O<sub>2</sub> production under different ultrasonic power levels; (b) Comparison of H<sub>2</sub>O<sub>2</sub> production under different catalyst loading conditions.

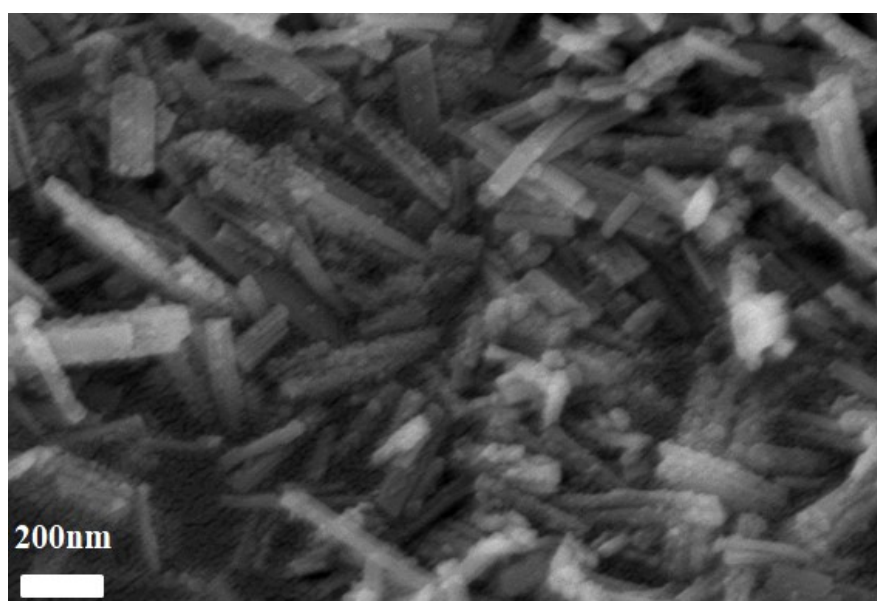

**Fig. S4.** SEM image of CdS/ZnS-1 after five cycles.

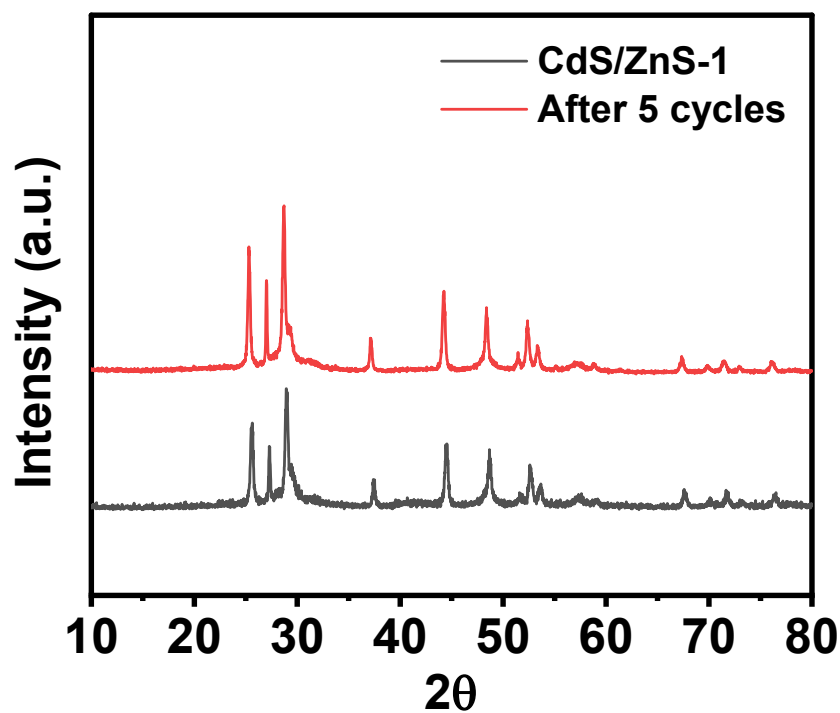

Fig. S5. XRD patterns of CdS/ZnS-1 before and after five cycles.

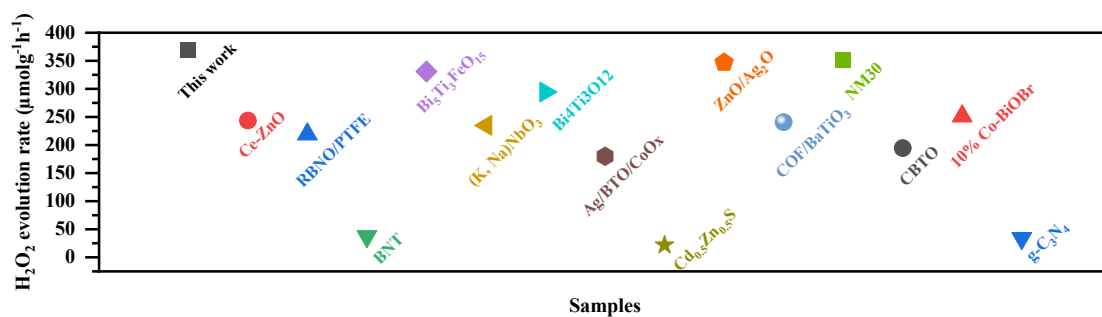

Fig. S6. Comparison of  $\text{H}_2\text{O}_2$  production performance over CdS/ZnS-1 catalysts with previously reported.

**Table S1.** Catalytic application for H<sub>2</sub>O<sub>2</sub> production driven by Ultrasonic vibration and corresponding experimental parameters.

| NO. | Sample                                            | Sample Dosage                        | Energy Source        | H <sub>2</sub> O <sub>2</sub> evolution rates (μmol g <sup>-1</sup> h <sup>-1</sup> ) | Reference |
|-----|---------------------------------------------------|--------------------------------------|----------------------|---------------------------------------------------------------------------------------|-----------|
| 1   | CdS/ZnS-1                                         | 50 mg cat<br>50 mL H <sub>2</sub> O  | 45 kHz · 180 W       | 369.3                                                                                 | This work |
| 2   | Ce-ZnO                                            | 50 mg cat<br>100 mL H <sub>2</sub> O | ultrasonic wave, 6 h | 243.67                                                                                | 1         |
| 3   | RBNO/PTFE                                         | 20 mg cat<br>30 mL H <sub>2</sub> O  | 68 kHz, 240 W        | 219.23                                                                                | 2         |
| 4   | BNT                                               | 50 mg cat<br>100 mL H <sub>2</sub> O | 53 kHz, 150 W        | 37.3                                                                                  | 3         |
| 5   | Bi <sub>5</sub> Ti <sub>3</sub> FeO <sub>15</sub> | 50 mg cat<br>50 mL H <sub>2</sub> O  | 40 kHz, 120 W        | 331                                                                                   | 4         |
| 6   | (K, Na)NbO <sub>3</sub>                           | 200 mg cat<br>50 mL H <sub>2</sub> O | 40 kHz, 180 W        | 235                                                                                   | 5         |
| 7   | Bi <sub>4</sub> Ti <sub>3</sub> O <sub>12</sub>   | 50 mg cat<br>100 mL H <sub>2</sub> O | 40 kHz, 100 W        | 294.4                                                                                 | 5         |
| 8   | Ag/BTO/CoOx                                       | 30 mg cat<br>30 mL H <sub>2</sub> O  | 40 kHz, 50 W         | 180                                                                                   | 5         |
| 9   | Cd <sub>0.5</sub> Zn <sub>0.5</sub> S             | 50 mg cat<br>100 mL H <sub>2</sub> O | 40 kHz, 120 W        | 21.9                                                                                  | 6         |
| 10  | ZnO/Ag <sub>2</sub> O                             | 100 mg cat<br>10 vol% MeOH           | 40 kHz, 400 W        | 346.9                                                                                 | 7         |
| 11  | COF/BaTiO <sub>3</sub>                            | 50 mg cat<br>100 mL H <sub>2</sub> O | 40 kHz, 300 W        | 240.7                                                                                 | 8         |
| 12  | NM30                                              | 5 mg cat<br>5 mL H <sub>2</sub> O    | 53 kHz, 100 W        | 351.1                                                                                 | 9         |
| 13  | CBTO                                              | 50 mg cat<br>100 mL H <sub>2</sub> O | 40 kHz, 300 W        | 194.54                                                                                | 10        |
| 14  | 10% Co-BiOBr                                      | 25 mg cat<br>5 vol% EtOH             | 40 kHz, 200 W        | 251.3                                                                                 | 11        |
| 15  | g-C <sub>3</sub> N <sub>4</sub>                   | 50 mg cat<br>100 mL H <sub>2</sub> O | 53 kHz, 150 W        | 34                                                                                    | 12        |

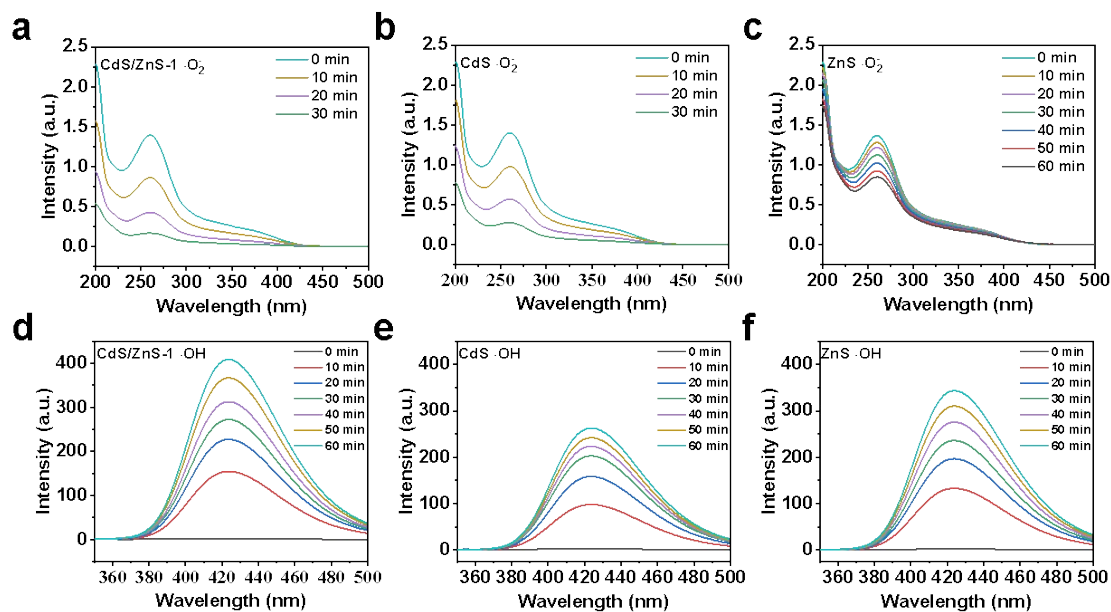

**Fig. S7.** Time-resolved profiles of superoxide anion radical ( $O_2^{\cdot-}$ ) generation from (a) CdS/ZnS-1, (b) CdS, and (c) ZnS under ultrasonic irradiation; Time-resolved profiles of hydroxyl radical ( $\cdot OH$ ) generation from (d) CdS/ZnS-1, (e) CdS, and (f) ZnS under ultrasonic irradiation.

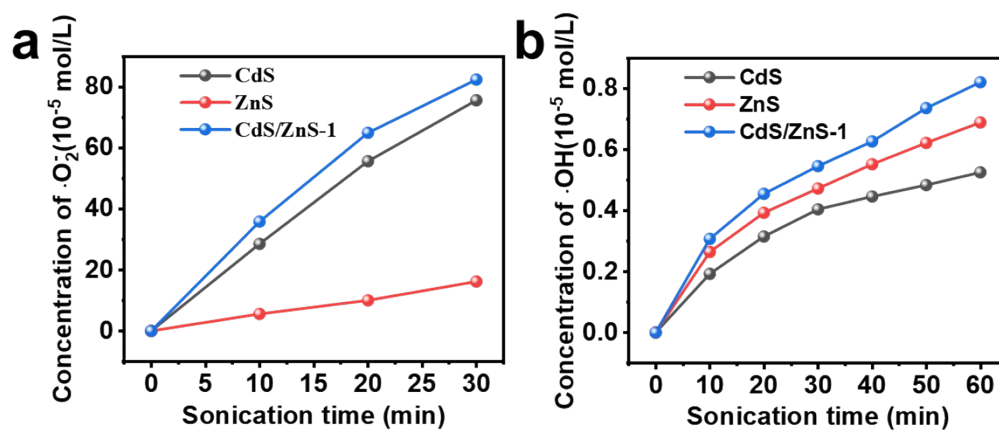

**Fig. S8.** (a) Concentration profiles of superoxide anion radical ( $O_2^{\cdot-}$ ) generated under ultrasonic irradiation; (b) Concentration profiles of hydroxyl radicals ( $\cdot OH$ ) generated under ultrasonic irradiation.

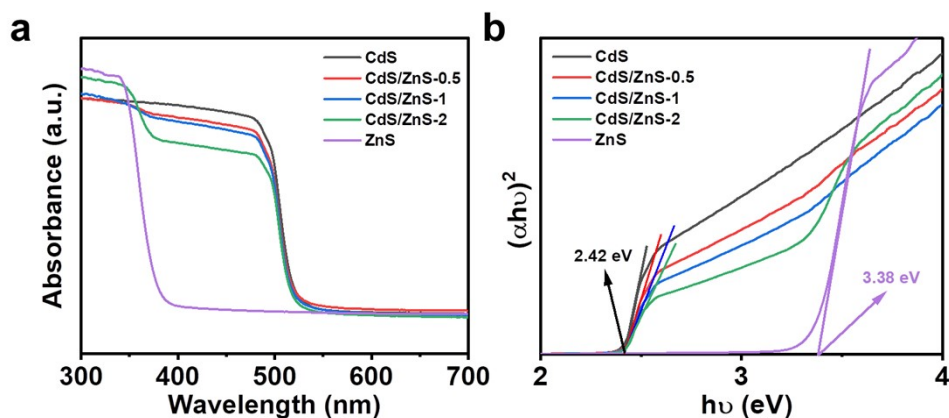

**Fig. S9.** (a) UV-Vis absorption spectra of CdS, CdS/ZnS-0.5, CdS/ZnS-1, CdS/ZnS-2, and ZnS. (b) Corresponding Tauc plots for determining the optical band gaps, where the band gaps of CdS (2.42 eV) and ZnS (3.38 eV) are indicated.

## References

1. G. Li, Q. Zhong, W. Wu, Y. Liu, H. Li, X. Li and T. Long, *J Colloid Interface Sci*, 2025, 700, 138431.
2. Y. Ma, B. Wang, Y. Zhong, Z. Gao, H. Song, Y. Zeng, X. Wang, F. Huang, M.-R. Li and M. Wang, *Chemical Engineering Journal*, 2022, 446.
3. Y. Zhang, Y. Lin, R. Li, Z. Chen, D. Zeng, S. Chen, W. Wang, L. Zhang, W. Wang, H. Nie and G. Wang, *Chemical Engineering Journal*, 2023, 465.
4. J. Xu, X. Sun, F. Wang, X. Wu, Y. Zhang, Q. Li and W. Ye, *Materials Reports: Energy*, 2025, 5.
5. L. Zhao, M. Xu, S. Yang, Z. Zhu, J. Qi and F. Meng, *ACS Sustainable Chemistry & Engineering*, 2025, 13, 8853–8869.
6. S. Lin, Q. Wang, H. Huang and Y. Zhang, *Small*, 2022, 18, 2200914.
7. J. Tang, Y. Hou, Y. Yang, H. Fu, J. Zhang, H. Gao, J. Chang and Y. Liao, *New Journal of Chemistry*, 2025, 49, 13539–13552.
8. X. Li, X. Yang, Q. Chen, Q. Yuan, H. Huang, S. Tu, Q. Zhang, F. Chen and M. Fu, *Small*, 2026, 22.
9. Y. Sun, J. Liu, Z. Zhang, C. Han, W. Qi, J. Chu, S. Liu and M. Yang, *The Journal of Physical Chemistry Letters*, 2025, 16, 4724–4733.
10. Q. Zhong, Y. Liu, G. Li, K. Sun, M. Chen, Y. Tang, B. Yan and T. Long, *Journal of Environmental Chemical Engineering*, 2026, 14.
11. A. Hao, Y. Ye, Y. Ran, J. Zhu, S. Hu, X. Zeng and X. Liu, *Langmuir*, 2025, 41, 27927–27934.
12. K. Wang, D. Shao, L. Zhang, Y. Zhou, H. Wang and W. Wang, *Journal of Materials Chemistry A*, 2019, 7, 20383–20389.
